# Supplementary material
Source: PubMed Central journal article supplement (PMC3444651)
Supplement: NIHMS399855-supplement-1_si_001.pdf [file NIHMS399855-supplement-1_si_001.pdf]

## Supporting Information

### Metabolism and Toxicity of Thioacetamide and Thioacetamide *S*-Oxide in Rat Hepatocytes

Liz Hajovsky,<sup>§</sup> Gang Hu,<sup>§</sup> Yakov Koen,<sup>§</sup> Diganta Sarma,<sup>§</sup> Wenqi Cui,<sup>¶</sup> Jeff L. Staudinger<sup>¶</sup> and  
Robert P. Hanzlik<sup>§,\*</sup>

Time-lapse movies of freshly isolated hepatocytes. After isolation, cells were allowed to attach to collagen-coated plates for 3 hr. They were then washed twice with PBS, the medium was replaced with fresh medium containing the treatment agents listed below and photography commenced. All movies represent 1040 minutes of time during the exposure period compressed to ca. 31 seconds of playback time. The interval between frames is 10 min and the playback rate is 0.3 sec/frame.

**Movie A01-A.** Untreated control cells.

**Movie A02-C.** Cells exposed to 1.5 mM TASO.

**Movie A03-C.** Cells exposed to 4.5 mM TASO.

**Movie B01-A.** Cells exposed to 20 mM TA.

**Movie B02-A.** Cells exposed to 1.5 mM TASO plus 20 mM TA.

**Movie B03-B.** Cells exposed to 4.5 mM TASO plus 20 mM TA.
